# **Full title: Current state of prevention of mother-to-child transmission of HIV in informal health centers in Douala and Ebolowa, Cameroon**

## **Short title: PMTCT in informal health centers**

Lydie Audrey Amboua-Schouamé<sup>1,2\*</sup>, Jean Joel Bigna<sup>3</sup>, Isacar Lucel Schouamé<sup>4</sup>, Sylvie Kwedi Nolina<sup>5,6</sup>, Antoine Socpa<sup>7</sup>

<sup>1</sup> School of Health Sciences, Catholic University of Central Africa, Yaounde, Cameroon

<sup>2</sup> Institut de Recherche pour le Développement France, Yaounde, Cameroon

<sup>3</sup>Department of Epidemiology and Public Health, Centre Pasteur du Cameroun, Yaounde, Cameroon

<sup>4</sup>Ministry of Agriculture and Rural Development, Yaounde, Cameroon

<sup>5</sup>Capacity for Leadership Excellence and Research (CLEAR), Yaounde, Cameroon

<sup>6</sup>Faculty of Medicine and Biomedical Sciences, University of Yaounde 1, Yaounde, Cameroon

<sup>7</sup>Anthropology Department, University of Yaounde 1, Yaounde, Cameroon

\*Corresponding author:

Lydie Audrey Amboua-Schouamé

Email : [ambschouamey@gmail.com](mailto:ambschouamey@gmail.com) (ASLA)

NOTE: This preprint reports new research that has not been certified by peer review and should not be used to guide clinical practice.

## 23 Abstract

24 **Background:** Informal health care providers are key actors for health care provision in  
25 developing countries for poor populations. Thus, in Cameroon, in 2017, there were more than  
26 3,000 Informal Health facilities. In a context of elimination of mother-to-child transmission of  
27 HIV, we describe the offer of Prevention of Mother to Child Transmission of HIV (PMTCT) in  
28 informal health centers.

29 **Methods:** This two-phase cross-sectional study was carried out in two cities in Cameroon  
30 notably Douala and Ebolowa. The first step was conducted from March 2019 to July 2019 in  
31 110 informal health centers and the second from August 2019 to January 2020 with 183  
32 Health Providers in these informal health centers. Standardized questionnaires were  
33 administered. Data collected were entered in kobo Collect software. Descriptive statistics and  
34 logistic regression at a level of significance of 5% were used.

35 **Results:** Of the 110 informal health centers, 109 integrated HIV testing into the antenatal  
36 check-up package. Among them, 43% (47/109) reported giving antiretroviral treatment to HIV  
37 infected pregnant women, while the remaining referred them to formal HIV care centers.  
38 Regarding delivery services, 52% (53/101) of those who offered them referred HIV exposed  
39 newborn for further PMTCT care. Knowledge of PMTCT was insufficient among 51% (94/183)  
40 of health providers and 90% (165/183) had insufficient PMTCT practices. Health providers  
41 with no PMTCT experience were more likely to have insufficient knowledge of PMTCT (aOR=  
42 32.04, 95%CI: 6.29 to 163.10, p<0.001) whereas, those without any formal PMTCT training  
43 were more at risk of having insufficient knowledge (aOR= 3.02, 95%CI: 1.06 to 8.64, p=0.03)  
44 and insufficient practices (OR= 4.35, 95%CI: 1.44 to 13.09, p=0.009) towards PMTCT.

45 **Conclusion:** Given their proximity to the populations and the PMTCT activities they conduct  
46 most often; particular attention should be paid to PMTCT in informal health centers.

## 47 Introduction

48 The various economic crises that have hit African countries as well as the following  
 49 structural adjustment policies from mid-80s had a serious impact on the creation of jobs and  
 50 services [1,2]. Consequently, an exponential increase of populations impoverishment and  
 51 informal activities were observed [2]. The latter will develop and spread in all sectors of  
 52 activity, including health sector. Following the impoverishment of populations in low-income  
 53 countries, they mainly resort to the informal health system for their health cases  
 54 management. This massive recourse was explained by its geographical proximity, its financial  
 55 accessibility and the flexibility of the mode of payment which is practiced there, as well as the  
 56 reduced waiting times [3–6].

57 In Cameroon, the economic crisis of the 1980s led to the reduction of public health  
 58 expenditure. These decrease from about 5% of the national budget in 1994 to less than 3% in  
 59 the following years [7]. The immediate consequence was the deterioration of the health  
 60 system and the quality of care and the parallel exponential rise of a vast network of informal  
 61 health providers [8–11]. This huge informal health network includes several actors: street  
 62 medicine vendors, traditional healers and Informal Health Centers (IHCs). In 2017, the  
 63 Ministry of Public Health made a census of 3,058 informal health facilities operating on the  
 64 national territory[12]. They operate without an official act of creation or operation issued by  
 65 the government. However, they are subject to taxation which seems paradoxical.

66 These IHCs, despite their limited technical facilities, generally provide a wide range of  
 67 services, integrating antenatal consultations and childbirths services [13,14]. Antenatal  
 68 consultations (ANC) are an essential aspect for the prevention of HIV transmission from  
 69 mother to child (PMTCT), since it represents a critical entry point into the PMTCT cascade  
 70 [15,16]. Especially in our context, client demand-based HIV testing is very low. Thus, the ANC

remains the major method for HIV testing in women [17]. Moreover, ANC is all the more important since the majority of pediatric HIV cases result from mother-to-child transmission [18–23].

Currently, nothing is known about PMTCT activities concerning the ICHs in Cameroon. As part of the ECIP PMTCT study, carried out in the cities of Douala and Ebolowa, we evaluated PMTCT in informal health centers. This paper aims to present the current state of PMTCT in IHCs in these two cities. Specifically, this work involved analyzing the PMTCT offer and assessing knowledge and practices of PMTCT. We also determined factors associated with the "insufficient" knowledge and practices among Healthcare Providers (HP) in the IHCs.

## Materials and methods

### Study design setting and population

We conducted a two-phases descriptive cross-sectional study in Douala and Ebolowa, two cities in Cameroon. The first phase was carried out from March to July 2019 and involved IHCs offering antenatal care and or childbirth service. The second phase, carried out from August 2019 to January 2020 involved HPs working in the above-mentioned services. A total of 110 IHCs were registered including 90 in Douala and 23 in Ebolowa; while 183 HPs were enrolled including 131 in Doula and 52 in Ebolowa.

## 90 Procedure

### 91 Definition of Informal Health Centers

92 We define an informal health center as any secular private health facility with a fixed  
93 location, without an official, government-issued, act of creation or operation, and without  
94 physicians.

95

### 96 Selection of informal health centers

97 To select the IHCs, we used the health map of the city of Douala and Ebolowa.  
98 Cameroon's health map divides each city into health districts. In the city of Douala, we have  
99 9 Health Districts: Boko, Japoma, Nylon, Bangue, Deido, Cité des Palmiers, Bonassama,  
100 Newbell and Logbaba. Health Districts were randomized using the Excel spreadsheet. This  
101 randomization allowed us to retain 7 health districts: Nylon, Bangue, Deido, Cité des Palmiers,  
102 Bonassama, Newbell and Logbaba. Once the Health Districts were known in the two research  
103 locations, field workers recruited for the study had a starting point in each Health District.  
104 This starting point was the benchmark for combing the informal health centers within the  
105 entire Health District Since the city of Ebolowa has only one Health District, the entire district  
106 was retained. An inventory of IHCs operating in Ebolowa was generated and a number of  
107 them were selected for inclusion in the study through a random process.

108

### 109 Data collection and Statistical analysis

110 Based on PMTCT assessment tool developed by Family Health international [24], we  
111 developed a questionnaire to capture information relating to PMTCT offer. The questionnaire  
112 collected information on availability of ANC services, integration of HIV testing in ANC  
113 package, supply of Antiretroviral Treatment (ART) to HIV Infected Pregnant Women (HIVPW),

ART supply source, availability of delivery services, availability of ARV for HIV exposed newborn, HIV tests used to incriminate an HIV infection, duration of the mother-child couple follow-up for IHCs providing on-site HIV care.

Furthermore, Health staff were interviewed using standardized questionnaires to assess their PMTCT Knowledge and Practices. The questionnaire was designed from the national guidelines for prevention and care of HIV in Cameroon [25]. Overall 14 and 7 questions evaluating PMTCT knowledge and practices, respectively, were asked to HPs.

The questionnaire also has an important section on Sociodemographic data (town, type of PMTCT site, gender, health training qualification, type of PMTCT training received, years of experience in PMTCT experience, history of formal PMTCT training during the last 2 years).

Regarding PMTCT knowledge, questions asked were on : HIV source; main route of HIV infection in children; lack of ARV coverage in HIVPW and risk of HIV infection in the child; lack of ARV prophylaxis coverage in the child and risk of HIV infection; ARV protocol recommended as first line treatment for HIVPW; delay of ART initiation in HIVPW; delay of ARV prophylaxis in HIV exposed children; recommended ARV prophylaxis in exposed children; duration of this prophylaxis; knowledge of early diagnosis for HIV exposed children; recommended age for HIV early diagnosis for HIV exposed children; Cotrimoxazole initiation delay in HIV-exposed children; recommended timing for stopping Cotrimoxazole in HIV exposed children; breastfeeding for HIV exposed children.

While for PMTCT practices, the questions were on the proposal of HIV testing to pregnant women; the practice of HIV pre- and post-test counseling; the proposal/reminder of the importance of ARV treatment to HIVPW; encouragement of HIV status disclosure to male partners; administration / reminder of the administration of ARV prophylaxis to HIV

exposed children; reminder to the HIV mothers of the importance of early infant diagnosis of HIV for exposed children; reference procedure for further PMTCT services. All the data collected were entering in Kobo Collect.

For sociodemographic variables, descriptive analyses were performed. To assess PMTCT knowledge and practices, for each good response gave, a score of one point was assigned and zero otherwise. The total score that an HP could therefore have oscillated between 0 and 14 for PMTCT knowledge and 0 to 7 for PMTCT practices. Afterwards, we calculated each scoring category as the percentage of correct answers divided by corresponding questions answered. The overall knowledge and practices were categorized as “insufficient” if the score was less than 80% and “sufficient” if 80% or above [26]. Multivariate logistic regression was used to identify associated factors to insufficient knowledge and practice of PMTCT among HPs at a level of significance of 5%.

## Ethical considerations

The ECIP-PMTCT study was approved by the National Ethics Committee of Cameroon (Ethical clearance n° 2019/03/1155/CE/CNERSH/SP) and by the Cameroonian Ministry of Public Health (Administrative authorization n° 631-15.19) before the implementation of the study. Informed and signed consent of Head of IHCs and HPs were also collected.

## Results

### PMTCT service offer in the ICHs

Almost all (109/110) of the IHCs integrated the HIV screening test within their antenatal check-up. For 95% (104/109), the final decision to make a diagnosis of HIV infection was preceded by the successive incrimination of HIV infection using the Determine and

OraQuick tests/strips. For the remaining IHCs only the Determine test was used for this purpose. As we can see in Figure1 below, among the 109 IHCs that integrated HIV screening in ANC, 43% (47/109) reported giving ART to HIVPW. More than half of the IHCs (26/47) followed HIVPW for a period of 2 months post-delivery. The health districts were the supply source of ART for 89% (42/47) of IHCs. For the remaining 11%, they got their ART from others IHCs. For IHCs referring HIVPW to formal HIV care centers, this reference was verbal, without any documentation. Only the name of the HIV care center was communicated to the HIVPW.

#### **Fig 1: Antenatal HIV screening, ART availability and source of supply**

Regarding delivery services (Fig.2), 92% (101/110) of IHCs provided them. For 52% (53/101) of IHCs, HIV exposed children were referred for Nevirapine prophylaxis and for further PMTCT care. Meanwhile, 48% (48/101) provided Nevirapine prophylaxis to HIV exposed children. None of the IHCs dispensed Cotrimoxazole or collected blood sample for the early infant diagnosis.

#### **Fig 2: Prophylactic ARV coverage in HIV exposed children in IHCs**

### **PMTCT knowledge and practices of health Providers**

#### **Description of HPs**

A total of 183 HPs were enrolled in the study, with the median age of 37 years (IQR, 30-44). Less than a quarter (19%) were male. The majority were Nurse Assistants (56%) and we had 7% of Health staff without any formal health training. Among HPs, almost 28% (51/183) were or had been Publics Servants in public health facilities. Indeed, 84% (43/51) of them were retired and 16% (8/51) were still in activity. All those Civil Servants were owners of IHCs.



The main source of PMTCT information was colleagues (84%) whereas 13% (23/183) received a formal training through workshops or seminars during the last two years. Slightly more than half (107/183) of HPs had PMTCT experience of less than 5 years (Table 1).

## PMTCT knowledge

For PMTCT knowledge, the median score was 79% (IQR, 71-93). Only 49% (89/183) of our HPs had sufficient PMTCT knowledge (scoring 80% or more). The question that registered the lowest score with 29% (58/183) was “Does an HIV infected woman on ART should breastfeed her child?” (Table.2)

## PMTCT Practices

Regarding PMTCT practices, the median score was 43% (IQR, 29-57). As table 3 shows, only one HP over ten (18/183) had a sufficient PMTCT knowledge. The question with the lowest score was “How do you refer an infected mother to an HIV treatment center?”, with only 8% (15/183) of good practices reported.

Only about 7% (12/183) of HPs had both sufficient knowledge and practices towards PMTCT. While 48% (88/183) had neither sufficient knowledge nor sufficient PMTCT practices.

**Table 1. Characteristics of Health providers in informal health centers**

|                                                              | Frequency | Percentage (%) |
|--------------------------------------------------------------|-----------|----------------|
| <b>Town (n=183)</b>                                          |           |                |
| Douala                                                       | 131       | 72             |
| Ebolowa                                                      | 52        | 28             |
| <b>Type of PMTCT site (n=183)</b>                            |           |                |
| Refer for PMTCT                                              | 119       | 65             |
| PMTCT follow-up site                                         | 64        | 35             |
| <b>Gender (n=183)</b>                                        |           |                |
| Female                                                       | 149       | 81             |
| Male                                                         | 34        | 19             |
| <b>Former or current Civil Servant(n=183)</b>                |           |                |
| Yes                                                          | 51        | 28             |
| No                                                           | 132       | 72             |
| <b>Health training qualification (n=183)</b>                 |           |                |
| No documented health training                                | 12        | 7              |
| Nurse assistant                                              | 103       | 56             |
| State certified Nurse                                        | 35        | 19             |
| Registered nurse                                             | 14        | 8              |
| Laboratory technician                                        | 19        | 10             |
| <b>Type of PMTCT training received (n=183)</b>               |           |                |
| None                                                         | 2         | 1              |
| By colleagues                                                | 154       | 84             |
| Documents reading                                            | 4         | 2              |
| Seminars / workshops                                         | 23        | 13             |
| <b>Years of experience in PMTCT(n=183)</b>                   |           |                |
| None                                                         | 25        | 14             |
| < 5 years                                                    | 107       | 59             |
| 5 – 10 years                                                 | 41        | 22             |
| >10 years                                                    | 10        | 5              |
| <b>Formal PMTCT training during the last 2 years (n=183)</b> |           |                |
| Yes                                                          | 23        | 13             |
| No                                                           | 160       | 87             |

## 224 Table 2. Health providers knowledge on PMTCT

| Items                                                                 |                              | Correct     |
|-----------------------------------------------------------------------|------------------------------|-------------|
| HIV source                                                            |                              | 100%        |
| Main route of HIV infection in children                               |                              | 99%         |
| No ARV coverage in HIVPW and risk of HIV infection in the child       |                              | 83%         |
| No ARV prophylaxis coverage in the child and risk of HIV infection    |                              | 77%         |
| ARV protocol recommended as first line treatment for HIVPW            |                              | 60%         |
| Delay of ART initiation in HIVPW                                      |                              | 96%         |
| Delay of ARV prophylaxis in HIV exposed children                      |                              | 83%         |
| Recommended ARV prophylaxis in HIV exposed children                   |                              | 85%         |
| Duration ARV prophylaxis in exposed children                          |                              | 76%         |
| Knowledge of early diagnosis for exposed children                     |                              | 94%         |
| Recommended age for HIV early diagnosis for HIV exposed children      |                              | 85%         |
| Cotrimoxazole initiation delay in HIV-exposed children                |                              | 50%         |
| Recommended timing for stopping cotrimoxazole in HIV exposed children |                              | 77%         |
| Breastfeeding for HIV exposed children                                |                              | 32%         |
| Overall knowledge score                                               | Median (IQR)                 | 79% (71-93) |
|                                                                       | Less than 80% (insufficient) | 51%         |
|                                                                       | 80% or more (sufficient)     | 49%         |

225

## 226 Table 3. Health Providers practices on PMTCT

| Items                                                                                               |                              | Correct     |
|-----------------------------------------------------------------------------------------------------|------------------------------|-------------|
| Proposal of HIV testing to pregnant women                                                           |                              | 100%        |
| Practice of HIV pre- and post-test counseling                                                       |                              | 40%         |
| Proposal/reminder of the importance of ARV treatment to infected pregnant women                     |                              | 52%         |
| Encouragement of HIV status disclosure to male partners                                             |                              | 15%         |
| Administration / reminder of the administration of ARV prophylaxis to exposed children              |                              | 52%         |
| Reminder to the HIV mothers of the importance of early infant diagnosis of HIV for exposed children |                              | 48%         |
| Reference procedure for further PMTCT services.                                                     |                              | 8%          |
| Overall practice score                                                                              | Median (IQR)                 | 43% (29-57) |
|                                                                                                     | Less than 80% (insufficient) | 90%         |
|                                                                                                     | 80% or more (sufficient)     | 10%         |

227

## Factors associated with poor knowledge and practices of PMTCT

In bivariate analyses, regarding health training qualification, HPs with no documented health training qualification were more likely to have insufficient PMTCT knowledge than Registered Nurses (OR= 7.35, 95% CI: 1.28 to 50, p=0.02). HPs with no PMTCT experience were forty-one time likely to have insufficient knowledge of PMTCT compared to those with 5 years or more (OR= 41.81, 95%CI: 8.51 to 205.38, p<0.001). In addition, those with less than 5 years of PMTCT experience were four time likely to do same (OR= 4.64, 95%CI: 2.15 to 10.01, p<0.001). Furthermore, HPs with no formal PMTCT training received during the past two years were slightly 3 times to have insufficient knowledge compared to those who were trained (OR= 2.72, 95%CI: 1.06 to 6.99, p=0.037).

As presented in Table 4 below, in multivariate logistic model, lack of formal PMTCT training and lack or fair experience in PMTCT were associated with insufficient knowledge of PMTCT. Indeed, HPs with no history of formal PMTCT training during the past two years were three time most at risk to have insufficient knowledge of PMTCT compared to those who were formally trained (aOR= 3.02, 95%CI: 1.06 to 8.64, p=0.03). Moreover, HPs with no PMTCT experience were thirty-two times at risk to have insufficient PMTCT Knowledge compared to those with 5 years' experience or more (aOR= 32.04, 95%CI: 6.29 to 163.10, p<0.001). Compared to the same reference, HPs with less than 5 years of experience in PMTCT had this risk four times (aOR= 4.50, 95%CI: 2.0 to 10.15, p<0.001).

**Table 4. Factors associated with insufficient level of PMTCT knowledge**

|                                              | Bivariable analysis |          | Multivariable analysis |          |         |
|----------------------------------------------|---------------------|----------|------------------------|----------|---------|
|                                              | OR (95% CI)         | P        | aOR (95% CI)           | P        | P       |
| <b>Town (n=183)</b>                          |                     |          |                        |          |         |
| Ebolowa                                      | 1                   |          |                        |          |         |
| Douala                                       | 1.49 (0.78-2.84)    | 0.22     |                        |          |         |
| <b>Type of PMTCT site (n=183)</b>            |                     |          |                        |          |         |
| PMTCT follow-up site                         | 1                   |          |                        |          |         |
| Refer for PMTCT                              | 0.98 (0.53-1.81)    | 0.96     |                        |          |         |
| <b>Sex (n=183)</b>                           |                     |          |                        |          |         |
| Male                                         | 1                   |          |                        |          |         |
| Female                                       | 0.59 (0.27-1.27)    | 0.18     |                        |          |         |
| <b>Health training qualification (n=183)</b> |                     |          |                        |          | 0.19    |
| Registered nurse                             | 1                   |          |                        |          |         |
| State certified nurse                        | 2.12 (0.53-8.33)    | 0.28     | 1.63 (0.35-7.69)       | 0.53     |         |
| Lab technician                               | 0.53(0.10 – 2.77)   | 0.45     | 0.49 (0.08-3.03)       | 0.43     |         |
| No documented health training                | 7.69 (1.28 – 50)    | 0.02*    | 3.44 (0.48-25)         | 0.21     |         |
| Nurse assistant                              | 2.04 (0.57-7.69)    | 0.26     | 2 (0.47-8.13)          | 0.34     |         |
| <b>Years of experience in PMTCT(n=183)</b>   |                     |          |                        |          | <0.001* |
| 5 years & more                               | 1                   |          |                        |          |         |
| < 5 years                                    | 4.64 (2.15-10.01)   | < 0.001* | 4.50 (2.0-10.15)       | < 0.001* |         |
| None                                         | 41.81 (8.51-205.38) | < 0.001* | 32.04 (6.29-163.10)    | < 0.001* |         |
| <b>Formal training on PMTCT</b>              |                     |          |                        |          |         |
| Yes                                          | 1                   |          |                        |          |         |
| No                                           | 2.72 (1.06-6.98)    | 0.03*    | 3.02 (1.06-8.64)       | 0.03*    |         |

252

253 For insufficient PMTCT practices, HPs who worked in IHCs in Douala were more likely  
 254 to have poorer practices regarding PMTCT (OR= 3.66, 95%CI: 1.35 to 9.88, p=0.01) compared  
 255 to those working in Ebolowa. Furthermore, HPs who did not received any formal PMTCT  
 256 training (OR= 4.35, 95%CI: 1.44 to 13.09, p=0.009) were most at risk compared to those who  
 257 were formally trained. And these associations were more pronounced in multivariate logistic  
 258 model as we can see in Table 5.

**Table 5. Factors associated with insufficient level of PMTCT practices**

|                                              | Bivariable analysis |        | Multivariable analysis |               |   |
|----------------------------------------------|---------------------|--------|------------------------|---------------|---|
|                                              | OR (95% CI)         | P      | aOR (95% CI)           | P             | P |
| <b>Town (n=183)</b>                          |                     |        |                        |               |   |
| Ebolowa                                      | 1                   |        |                        |               |   |
| Douala                                       | 3.66 (1.35-9.88)    | 0.01*  | 4.09 (1.45-11.55)      | <b>0.008*</b> |   |
| <b>Type of PMTCT site (n=183)</b>            |                     |        |                        |               |   |
| PMTCT follow-up site                         | 1                   |        |                        |               |   |
| Refer for PMTCT                              | 4.34 (1.54-12.21)   | 0.005* |                        |               |   |
| <b>Sex (n=183)</b>                           |                     |        |                        |               |   |
| Male                                         | 1                   |        |                        |               |   |
| Female                                       | 0.23 (0.03-1.83)    | 0.16   |                        |               |   |
| <b>Health training qualification (n=183)</b> |                     |        |                        |               |   |
| No documented health training                | 1                   |        |                        |               |   |
| State certified Nurse                        | 1.20 (0.20-7.18)    | 0.84   |                        |               |   |
| Lab technician                               | 3.60 (0.28 –44.82)  | 0.31   |                        |               |   |
| Registered nurse                             | 1.20 (0.14 – 10.11) | 0.86   |                        |               |   |
| Nurse assistant                              | 2.37 (0.44-12.75)   | 0.31   |                        |               |   |
| <b>Years of experience in PMTCT(n=183)</b>   |                     |        |                        |               |   |
| None                                         | 1                   |        |                        |               |   |
| < 5 years                                    | 0.40 (0.04-3.31)    | 0.39   |                        |               |   |
| 5 – 10 years                                 | 0.30 (0.03-2.73)    | 0.28   |                        |               |   |
| >10 years                                    | 0.16 (0.01- 2.09)   | 0.16   |                        |               |   |
| <b>Formal training on PMTCT</b>              |                     |        |                        |               |   |
| Yes                                          | 1                   |        |                        |               |   |
| No                                           | 4.35 (1.44-13.09)   | 0.009* | 5.03 (1.57-16.07)      | <b>0.006*</b> |   |

## Discussion

In this study, we presented the current state of PMTCT in informal health centers in the cities of Douala and Ebolowa in Cameroon. The study highlighted that almost all (99%) IHCs with ANC services integrated HIV testing in antenatal laboratory exams. This study was carried

out in IHCs in Ebolowa and Douala, respectively main towns of the South and Littoral Regions of Cameroon. When we look at Cameroon national PMTCT data from 2019, we see that the coverage of HIV testing in these Regions (98.2% and 93.7% respectively) is largely above the national coverage of 82.8% [27]. This could lead one to think that the formal ANC services in these regions mainly include the HIV screening test in the antenatal laboratory exams package; and the informal health centers followed this trend.

Our results showed that, unlike other informal health providers that typically have little or no formal health training, the majority of those working in IHCs in our setting had received formal health training. On the one hand we have some owners of IHCs who are retired civil servants or still in service. On the other, HPs who have not been able to integrate into the formal health system. Regarding the latter, Similar results were found in studies on informal health care services in Nigeria. Indeed, in these studies, among the informal providers, there were those with adequate formal health training. They found themselves in the informal sector because they could not obtain a position in the formal healthcare system and in order to generate income and apply their knowledge [14,28]. On another side, it is clear from the findings of this study that most HPs have insufficient knowledge (51%) relating to PMTCT and performed worse practices (90%) towards PMTCT.

These gaps reflect the concern of some about the quality of care provided by informal providers in general [28–30]. However, some studies conducted in formal health facilities in Cameroon founded similar results. Those studies showed that about 40% of Health Care Workers (HCWs) had insufficient knowledge [31–33] and a great number (76%) had insufficient practices of PMTCT [31]. By this comparison with formal sector, we finally observe that in terms of poor PMTCT knowledge, and poor PMTCT practices, being informal or formal

does not seem to matter since they majority of health providers in the two sectors are lacking knowledge and practices regarding PMTCT.

The item that recorded the lowest score regarding PMTCT knowledge was breastfeeding of HIV exposed child. In fact, lack of knowledge about HIV exposed infant feeding was high among our HPs. This show either lack of awareness of HPs regarding most recent WHO guidelines on HIV and infant feeding, that promote exclusive breastfeeding for the six first months of live [34]; or fear of vertical transmission from mother to child despite the ART coverage in the HIV mother. Same results in different settings were documented in some studies even with HCWs in formal health facilities [35,36].

In this study, only 8% of HCWs would refer participants with a completed form. Indeed, the referral of the cases practiced in our context was limited to a verbal referral; consisting of a recommendation in which the provider gives just the name of the health facilities, preferably public, where the patient can ensure the continuum of care. This type of verbal and general referral is widely practiced by informal care providers [13,14]. In Cameroon a review of maternal deaths at Douala General hospital highlighted that all references made by IHCs were verbal without any documentation. This made it difficult for the reception hosted health facility to know prior interventions received by the patient.

Nevertheless, referrals management issue is not specific to IHCs. Even in formal health facilities, referral systems is a big issue. Even though there is a formal referral system with guidelines on referral [37].

In addition, only 15% of HPs encouraged HIVPW to disclose their HIV status to their male partners and proposed them HIV counselling and screening. Yet HIV counselling and



310 testing of male partners of pregnant women is a relevant strategy to increase the use of  
311 PTMCT services [38–40].

312 In the multivariate logistic model, the lack of formal training in PMTCT was the only  
313 factor that was associated with both the insufficient of knowledge and practices in PMTCT.  
314 Inadequate PMTCT knowledge and practices due to lack of formal PMTCT training is not  
315 specific to IHCs. Indeed, several studies in formal health facilities have shown that the low  
316 skills of HCWs relating to PMTCT were attributable to the lack of training, which constitutes a  
317 hindrance to access to reliable and complete information [31,41] .

318 Furthermore, HPs without any experience in PMTCT were thirty-two times more at  
319 risk to have poor knowledge on PMTCT compared to those with at least 5 years' experience.  
320 The latter used to perform PMTCT activity during a considerable period of time.  
321 Consequently, doing the same thing during a long period may lead to a better understanding  
322 and better knowledge.

323 These results ultimately imply the need for PMTCT programs to emphasize the training  
324 of Staff involve primarily in Mother and Child services, as training enhances knowledge  
325 retention. Also, the formative supervisions which will make it possible to better fix  
326 knowledge, should be reinforced in order to elucidate the doubts/shadow zones which the  
327 staffs encounter in their daily clinical activities, and keep them up to date with good PMTCT  
328 practices.

329 However, this study is likely to have a power issue due to the small sample sizes  
330 analysed.

## Conclusion

This study, HIV testing in antenatal care services was offered by the majority of IHCs. But the level of knowledge and practices related to PMTCT was very low. A good number of IHCs referred HIVPW for HIV care. Verbal referrals were the predominant referral system performed. Since IHCs receive pregnant women and perform a number of PMTCT activities, they must not be left behind in the strategy towards the achievement of elimination of HIV transmission from mother to child in Cameroon.

## Acknowledgements:

The authors are grateful all the managers of the informal health centers who allowed us to carry out this study in their structures, all their staff who take part in this study and Cédric Djadda who helped us to collect the questionnaires in the city of Douala.

## References

- [1] Lachaud J-P. Le désengagement de l'Etat et les ajustements sur le marché du travail en Afrique francophone. 1re éd. Genève : Institut international d'études sociales ; 1989.
- [2] Union Africaine. Etude sur le secteur informel en Afrique. Addis Abeba, Ethiopia: 2008.
- [3] Godlonton S, Okeke EN. Does a ban on informal health providers save lives? Evidence from Malawi. Journal of Development Economics 2016; 118:112–32.  
<https://doi.org/10.1016/j.jdeveco.2015.09.001>.
- [4] Musyimi CW, Mutiso VN, Ndeti DM, Unanue I, Desai D, Patel SG, et al. Mental health treatment in Kenya: task-sharing challenges and opportunities among informal health providers. International Journal of Mental Health Systems 2017;11.  
<https://doi.org/10.1186/s13033-017-0152-4>.

353 [5] Somsé P, Mberyo-Yaah F, Morency P, Dubois MJ, Grésenguet G, Pépin J. Quality of sexually  
354 transmitted disease treatments in the formal and informal sectors of Bangui, Central African  
355 Republic. *Sex Transm Dis* 2000 ;27 :458–64.

356 [6] Mendo E, Boidin B, Donfouet HPP. Le recours aux micro-unités de soins informelles à Yaoundé  
357 (Cameroun) : déterminants et perspectives. *Journal de gestion et d'économie médicales* 2015  
358 ;33 :73. <https://doi.org/10.3917/jgem.151.0073>.

359 [7] National Institute of Statistics. Third Cameroon Household Survey 2007. 2007.  
360 <https://www.ilo.org/surveyLib/index.php/catalog/374> (accessed March 6, 2021).

361 [8] Geest SV der. Les médicaments sur un marché camerounais : Reconsidération de la  
362 commodification et de la pharmaceuticalisation de la santé. *Anthropologiesante* 2017.  
363 <https://doi.org/10.4000/anthropologiesante.2450>.

364 [9] Meva'a Abomo D. Le fardeau de la lutte contre le paludisme urbain au Cameroun : état des  
365 lieux, contraintes et perspectives. *Revue Canadienne de Géographie Tropicale* 2016 ;3 :26–42.

366 [10] Socpa A. Les Pharmacies de rue dans l'espace médical urbain. Emergence et déterminants des  
367 stratégies informelles d'accès aux médicaments à Douala. *Anthropologie*. Yaoundé I, 1995.

368 [11] Wogaing J. De la quête à la consommation du médicament au Cameroun. *Revue Internationale*  
369 *sur le Médicament* 2010 ;3.

370 [12] Ministry of Public Health. Assainissement de la carte sanitaire 2017.

371 [13] Ekane G, Mangala F, Obinchemti T, Nguetack C, Njamen T, Kamgaing J, et al. A Review of  
372 Maternal Deaths at Douala General Hospital, Cameroon: The Referral System and Other  
373 Contributing Factors. *IJTDH* 2015; 8:124–33. <https://doi.org/10.9734/IJTDH/2015/18111>.

374 [14] Sieverding M, Beyeler N. Integrating informal providers into a people-centered health systems  
375 approach: qualitative evidence from local health systems in rural Nigeria. *BMC Health Services*  
376 *Research* 2016;16. <https://doi.org/10.1186/s12913-016-1780-0>.

377 [15] Turan JM, Onono M, Steinfeld RL, Shade SB, Owuor K, Washington S, et al. Implementation and  
378 Operational Research: Effects of Antenatal Care and HIV Treatment Integration on Elements of  
379 the PMTCT Cascade Results From the SHAIIP Cluster-Randomized Controlled Trial in Kenya.

380 JAIDS Journal of Acquired Immune Deficiency Syndromes 2015;69: e172–81.  
381 <https://doi.org/10.1097/QAI.0000000000000678>.  
382 [16] Washington S, Owuor K, Turan JM, Steinfeld RL, Onono M, Shade SB, et al. Implementation and  
383 Operational Research: Effect of Integration of HIV Care and Treatment Into Antenatal Care  
384 Clinics on Mother-to-Child HIV Transmission and Maternal Outcomes in Nyanza, Kenya: Results  
385 From the SHAIPI Cluster Randomized Controlled Trial. JAIDS Journal of Acquired Immune  
386 Deficiency Syndromes 2015;69: e164–71. <https://doi.org/10.1097/QAI.0000000000000656>.  
387 [17] Psaros C, Remmert JE, Bangsberg DR, Safren SA, Smit JA. Adherence to HIV Care after  
388 Pregnancy among Women in Sub-Saharan Africa: Falling Off the Cliff of the Treatment Cascade.  
389 Curr HIV/AIDS Rep 2015; 12:1–5. <https://doi.org/10.1007/s11904-014-0252-6>.  
390 [18] De Cock KM, Fowler MG, Mercier E, de Vincenzi I, Saba J, Hoff E, et al. Prevention of mother-to-  
391 child HIV transmission in resource-poor countries: translating research into policy and practice.  
392 JAMA 2000; 283:1175–82.  
393 [19] Embree J. The impact of HIV/AIDS on children in developing countries. Paediatric Child Health  
394 2005; 10:261–3.  
395 [20] Gong T, Wang H, He X, Liu J, Wu Q, Wang J. Investigation of prevention of mother to child HIV  
396 transmission program from 2011 to 2017 in Suzhou, China. Scientific Reports 2018; 8:18071.  
397 <https://doi.org/10.1038/s41598-018-36623-6>.  
398 [21] Kassa GM. Mother-to-child transmission of HIV infection and its associated factors in Ethiopia:  
399 a systematic review and meta-analysis. BMC Infect Dis 2018;18.  
400 <https://doi.org/10.1186/s12879-018-3126-5>.  
401 [22] Tudor Car L, Van Velthoven MHMMT, Brusamento S, Elmoniry H, Car J, Majeed A, et al.  
402 Integrating Prevention of Mother-to-Child HIV Transmission Programs to Improve Uptake: A  
403 Systematic Review. PLoS One 2012;7. <https://doi.org/10.1371/journal.pone.0035268>.  
404 [23] Prendergast AJ, Essajee S, Penazzato M. HIV and the Millennium Development Goals. Arch Dis  
405 Child 2015;100: S48–52. <https://doi.org/10.1136/archdischild-2013-305548>.

- 406 [24] Family Health International, Institute for HIV/AIDS. Baseline Assessment Tools for Preventing  
407 Mother-to-Child Transmission (PMTCT) Of HIV 2003:92.
- 408 [25] Ministry of Public Health. National guideline on the prevention and management of HIV in  
409 Cameroon. Yaounde, Cameroun: 2015.
- 410 [26] Gebreselassie AF, Bekele A, Tatere HY, Wong R. Assessing the knowledge, attitude and  
411 perception on workplace readiness regarding COVID-19 among health care providers in  
412 Ethiopia—An internet-based survey. PLoS One 2021 ;16 : e0247848.  
413 <https://doi.org/10.1371/journal.pone.0247848>.
- 414 [27] CNLS. 2019 PMTCT progress report. Yaounde, Cameroon: 2020.
- 415 [28] Bloom G, Standing H, Lucas H, Bhuiya A, Oladipo O, Peters DH. Making health markets work  
416 better for poor people: the case of informal providers. Health Policy Plan 2011;26 Suppl 1: i45-  
417 52. <https://doi.org/10.1093/heapol/czr025>.
- 418 [29] Jishnu Das, Chowdhury A, Reshmaan H, Abhijit V. B. The impact of training informal health care  
419 providers in India: A randomized controlled trial. SCIENCE 2016.
- 420 [30] Sudhinaraset M, Ingram M, Lofthouse HK, Montagu D. What Is the Role of Informal Healthcare  
421 Providers in Developing Countries? A Systematic Review. PLoS One 2013;8.  
422 <https://doi.org/10.1371/journal.pone.0054978>.
- 423 [31] Nkwabong E, Meboulou Nguel R, Kamgaing N, Keddi Jippe AS. Knowledge, attitudes and  
424 practices of health personnel of maternities in the prevention of mother-to-child transmission  
425 of HIV in a sub-Saharan African region with high transmission rate: some solutions proposed.  
426 BMC Pregnancy Childbirth 2018; 18:227. <https://doi.org/10.1186/s12884-018-1876-0>.
- 427 [32] Temitope A, Ofili A, JUE O, Adejumo O. Health Workers' Knowledge of Preventing Mother-To-  
428 Child Transmission of HIV in Benin City, Edo State, Nigeria. Journal of Community Medicine and  
429 Primary Health Care 2017; 29:1–10.
- 430 [33] Arisegi S, Awosan K, Abdulsamad H, Adamu A, Isah M, Mora S. Knowledge and Practices  
431 Regarding Prevention of Mother-to-child Transmission of HIV among Health Workers in

- Primary Healthcare Centers in Sokoto, Nigeria. ISRR 2017; 6:1–9.  
<https://doi.org/10.9734/ISRR/2017/38680>.
- [34] World Health Organization. Guideline: updates on HIV and infant feeding. Geneva, Switzerland: 2016.
- [35] Samburu BM, Kimiywe J, Young SL, Wekesah FM, Wanjohi MN, Muriuki P, et al. Realities and challenges of breastfeeding policy in the context of HIV: a qualitative study on community perspectives on facilitators and barriers related to breastfeeding among HIV positive mothers in Baringo County, Kenya. Int Breastfeed J 2021; 16:39. <https://doi.org/10.1186/s13006-021-00385-1>.
- [36] Nyoni S, Sweet L, Clark J, Ward P. A realist review of infant feeding counselling to increase exclusive breastfeeding by HIV-positive women in sub Saharan-Africa: what works for whom and in what contexts. BMC Public Health 2019; 19:570. <https://doi.org/10.1186/s12889-019-6949-0>.
- [37] World Health Organization. WHO global strategy on people-centered abd integrated health services: interim report. Geneva: 2015.
- [38] Abuogi L, Hampanda K, Odwar T, Helova A, Odeny T, Onono M, et al. HIV status disclosure patterns and male partner reactions among pregnant women with HIV on lifelong ART in Western Kenya. AIDS Care 2020; 32:858–68. <https://doi.org/10.1080/09540121.2019.1659915>.
- [39] Hampanda K, Helova A, Odwar T, Odeny T, Onono M, Bukusi E, et al. Male partner involvement and successful completion of the prevention of mother-to-child transmission continuum of care in Kenya. Int J Gynecol Obstet 2021; 152:409–15. <https://doi.org/10.1002/ijgo.13442>.
- [40] Chanyalew H, Girma E, Birhane T, Chanie MG. Male partner involvement in HIV testing and counseling among partners of pregnant women in the Delanta District, Ethiopia. PLOS ONE 2021;16: e0248436. <https://doi.org/10.1371/journal.pone.0248436>.
- [41] Kufe NC, Metekoua C, Nelly M, Tumasang F, Mbu ER. Retention of health care workers at health facility, trends in the retention of knowledge and correlates at 3rd year following training of health care workers on the prevention of mother-to-child transmission (PMTCT) of

459 HIV–National Assessment. BMC Health Serv Res 2019; 19:78. <https://doi.org/10.1186/s12913->  
460 019-3925-4.

462

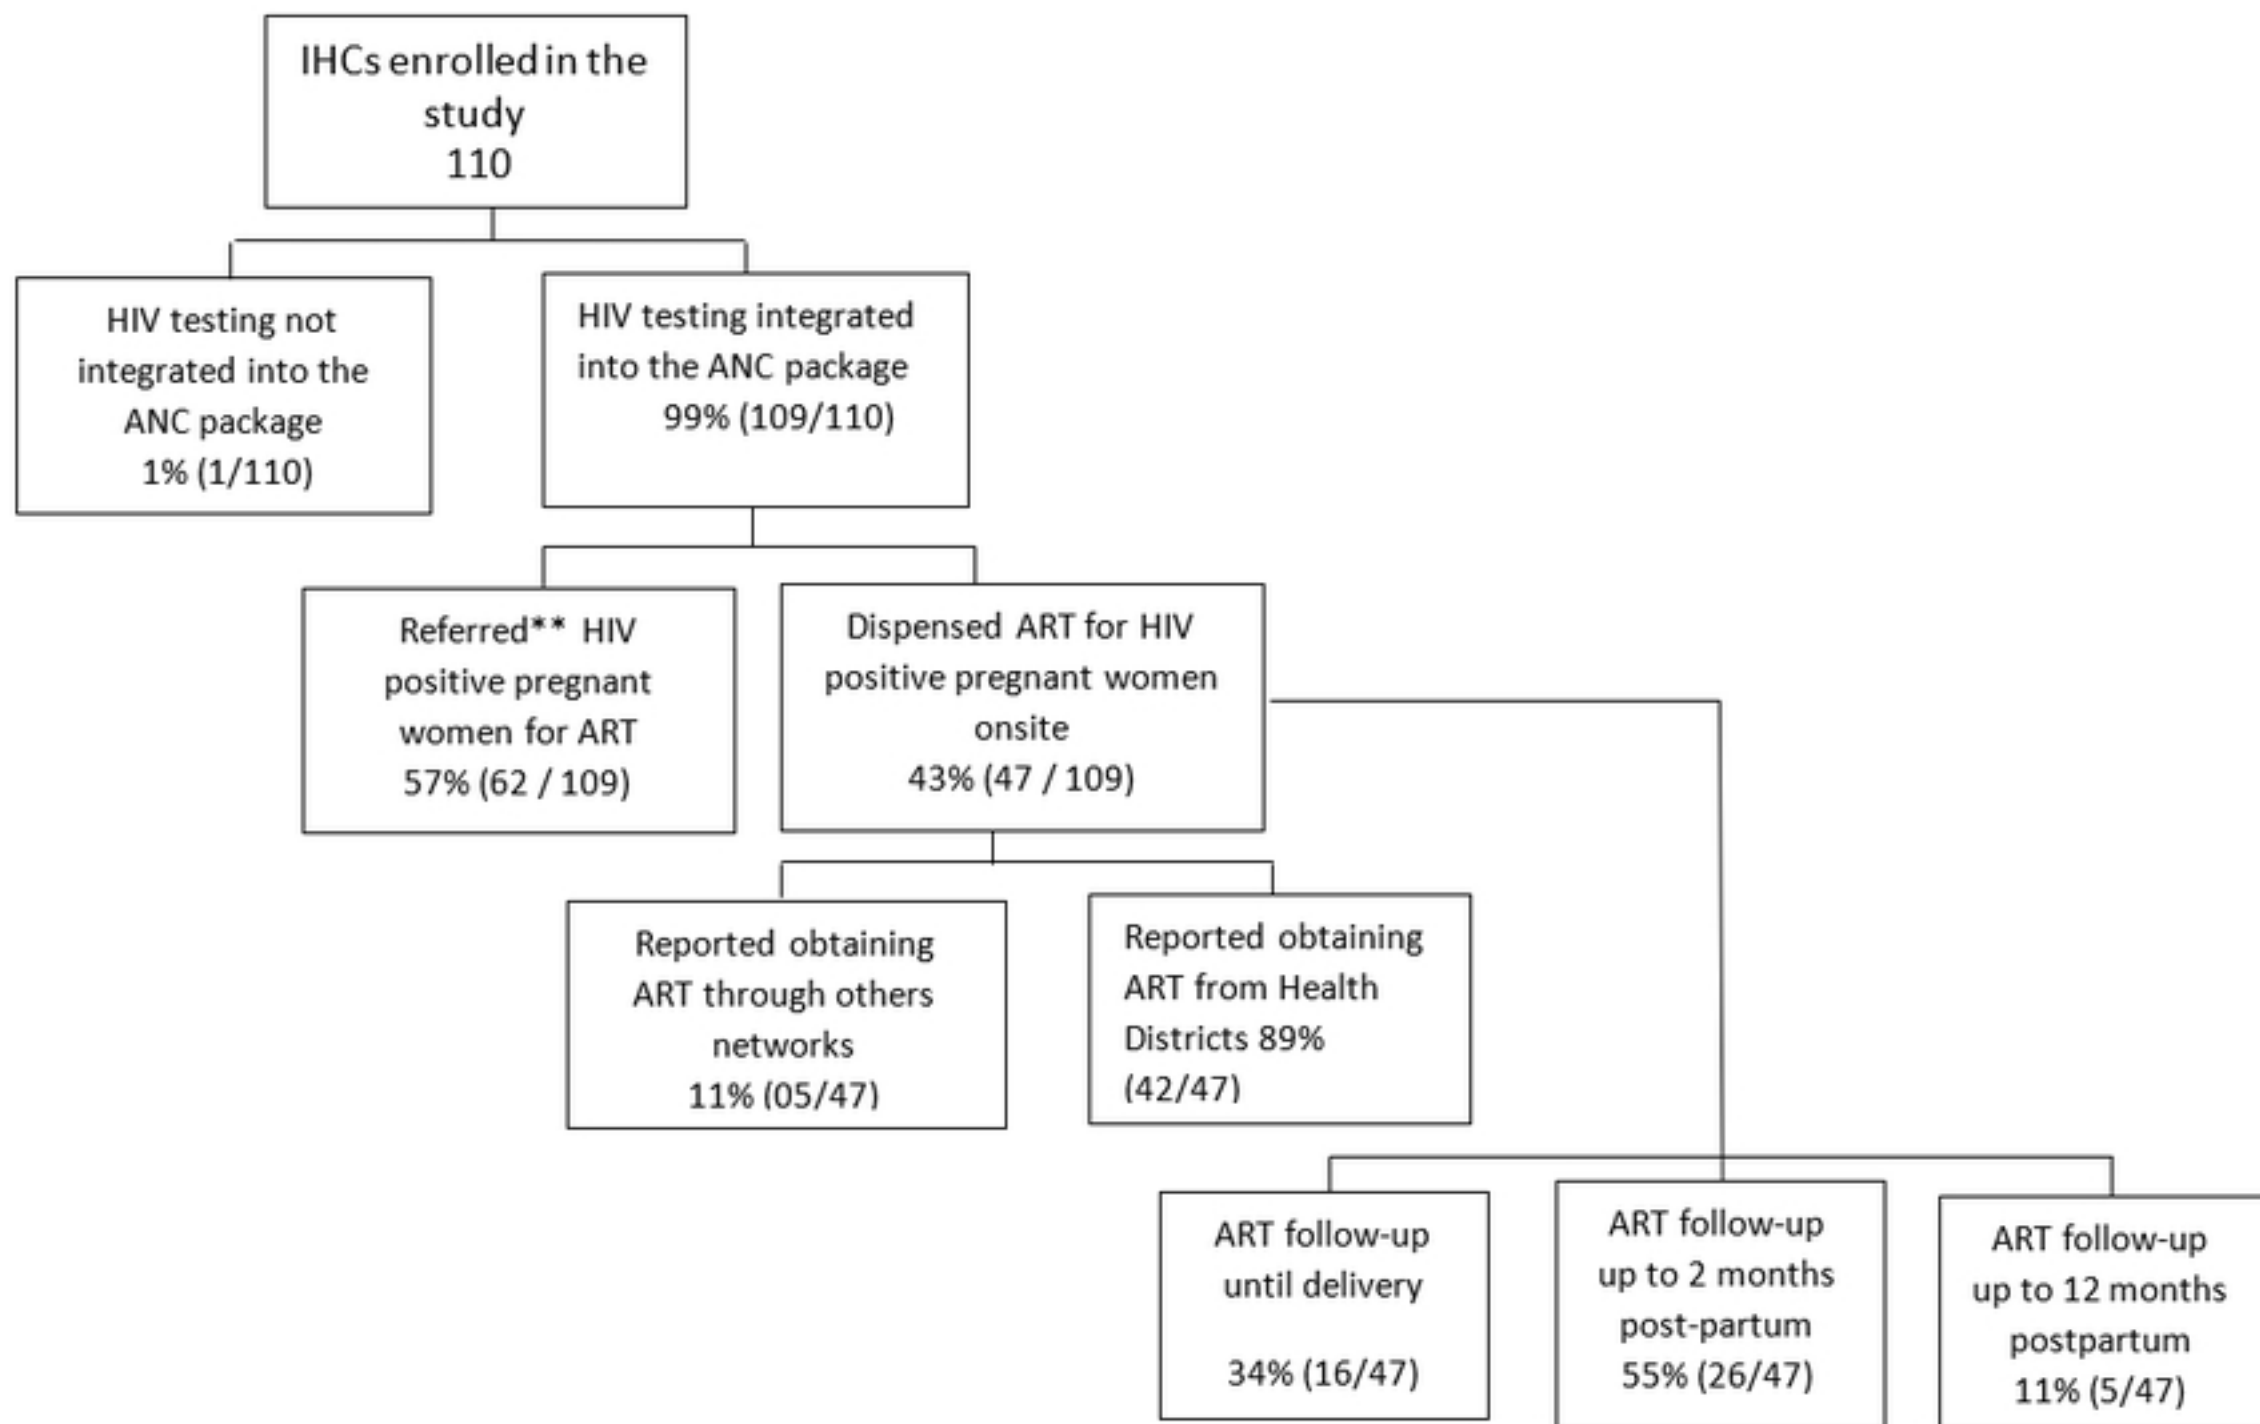

Fig 1. Antenatal HIV screening, ART availability and source of supply



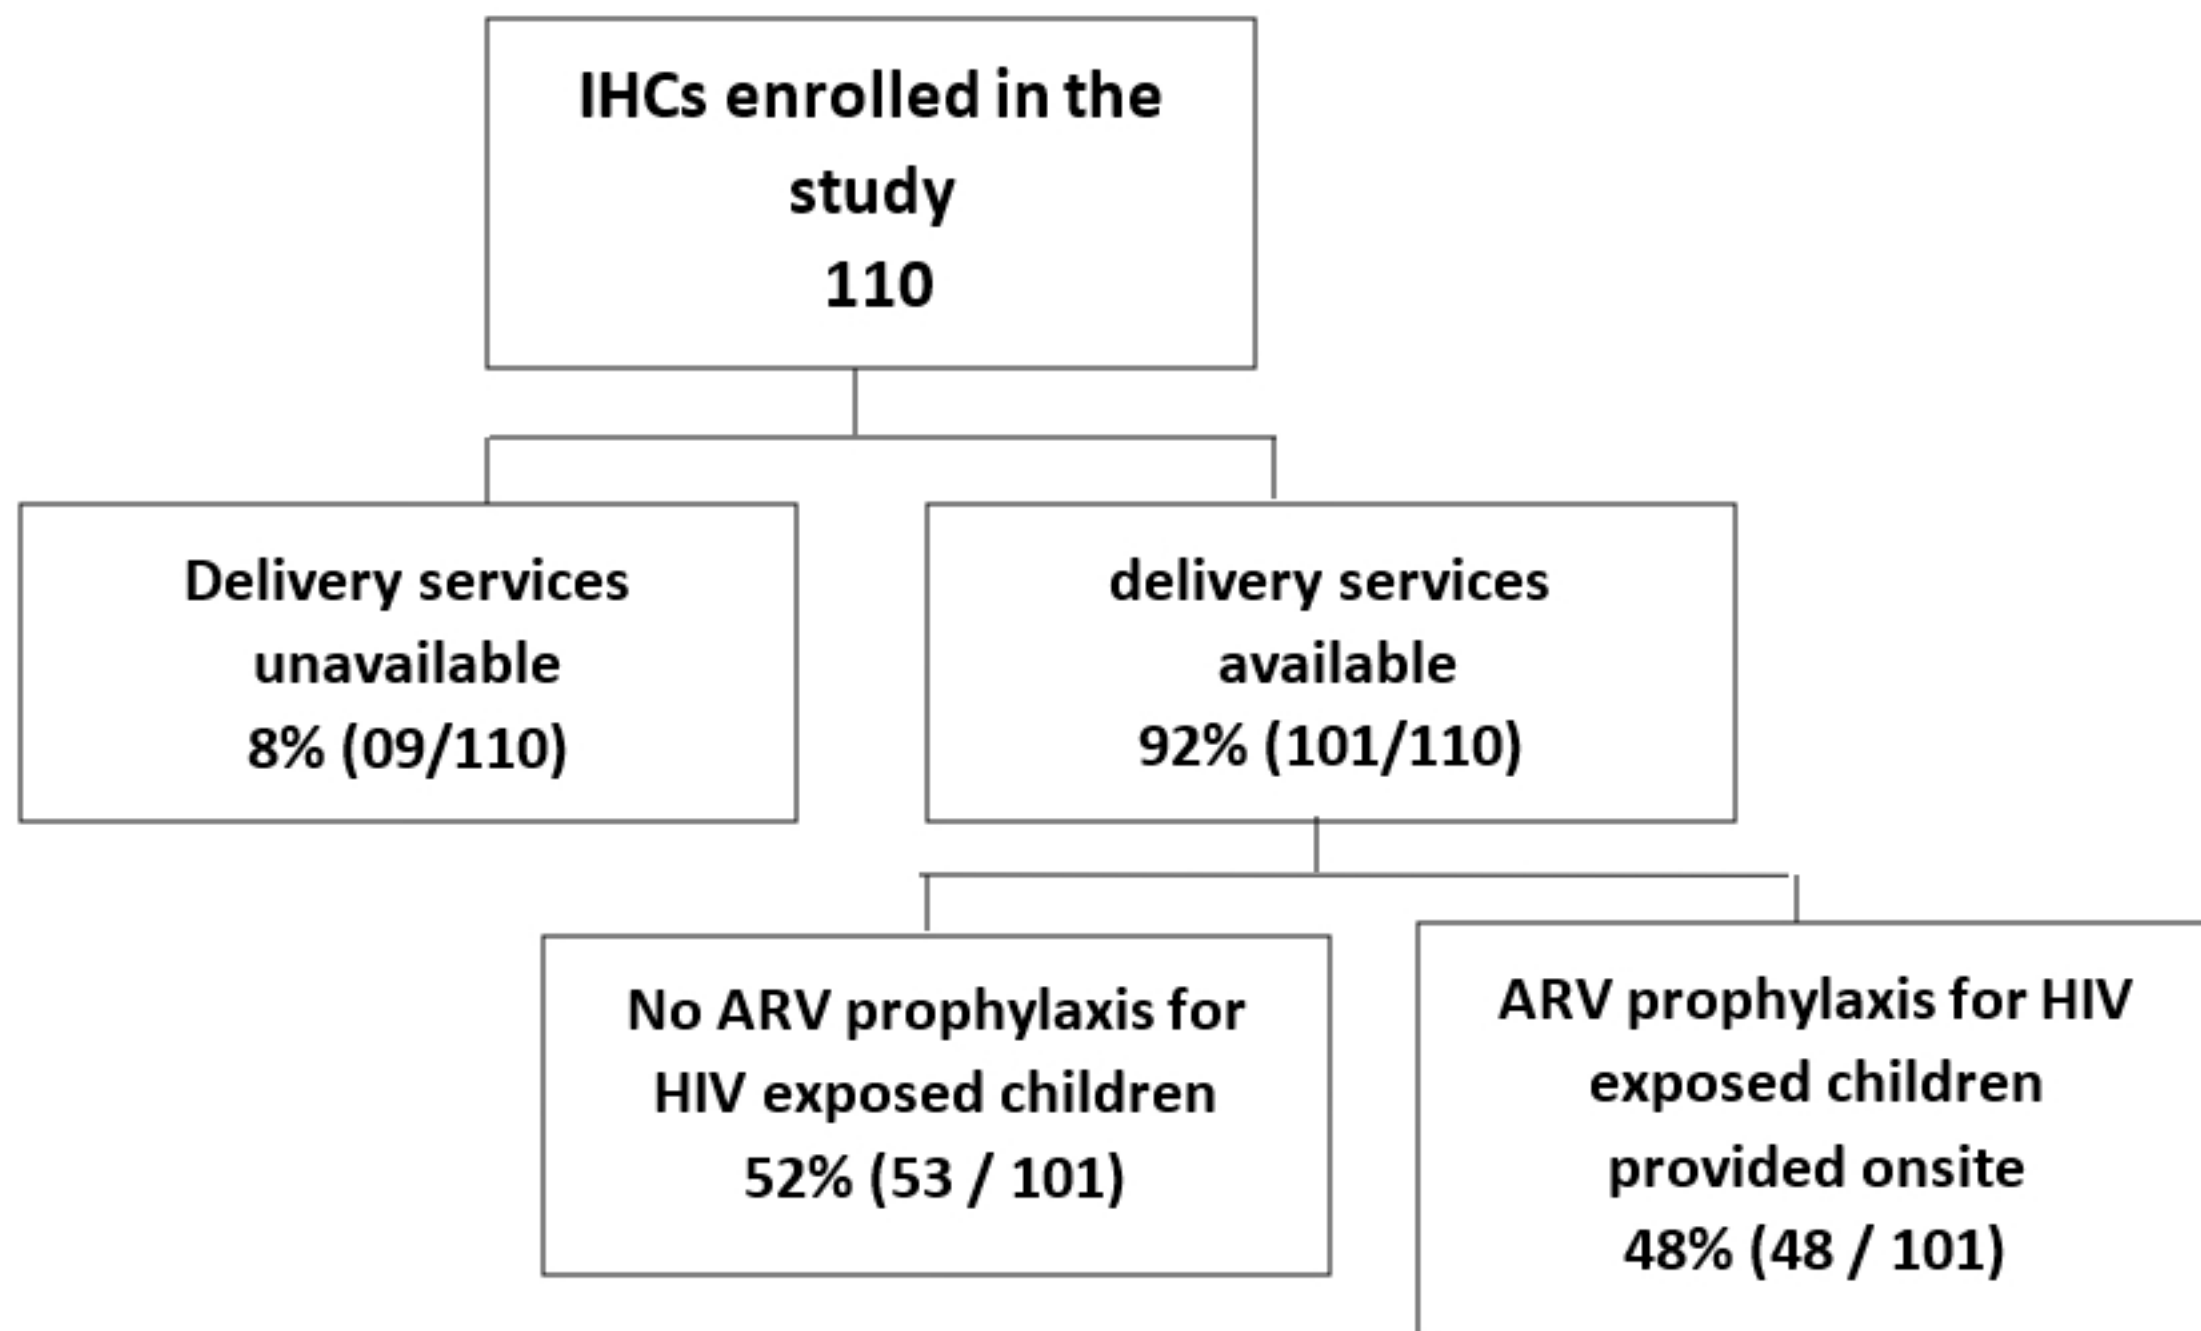

**Fig 2: Prophylactic ARV coverage in HIV exposed children in IHCs**

Figure
